# Supplementary material for: Physical Activity and Subsequent Risk of Hospitalization With Peripheral Artery Disease and Critical Limb Ischemia in the ARIC Study
Source: PubMed Central journal article supplement — J Am Heart Assoc. 2019 Oct 23;8(21):e013534. doi: 10.1161/JAHA.119.013534 (PMC6898846; doi:10.1161/jaha.119.013534), 2019-10-23
Supplement: JAH3-8-e013534-s001.pdf [file JAH3-8-e013534-s001.pdf]

# **SUPPLEMENTAL MATERIAL**

**Table S1. Hazard ratios of incident PAD and CLI, multiplicative and additive interaction (95% confidence intervals) of American Heart Association-defined intermediate physical activity level with demographic and clinical conditions.**

|                     | Intermediate vs.<br>Poor physical<br>activity | $\beta_3$            | P-<br>values | RERI                 | P-values |
|---------------------|-----------------------------------------------|----------------------|--------------|----------------------|----------|
| <b>PAD</b>          |                                               |                      |              |                      |          |
| <b>Sex</b>          |                                               |                      |              |                      |          |
| Male                | 1.01 (0.71-1.44)                              |                      |              |                      |          |
| Female              | 0.89 (0.63-1.27)                              | -0.12 (-0.61-0.36)   | 0.615        | -0.13 (-0.62-0.37)   | 0.618    |
| <b>Race</b>         |                                               |                      |              |                      |          |
| White               | 1.02 (0.76-1.38)                              |                      |              |                      |          |
| Black               | 0.79 (0.48-1.29)                              | -0.25 (-0.82-0.31)   | 0.380        | -0.32 (-0.99-0.35)   | 0.343    |
| <b>Age</b>          |                                               |                      |              |                      |          |
| <55                 | 0.63 (0.42-0.93)*                             |                      |              |                      |          |
| $\geq 55$           | 1.33 (0.95-1.84)                              | 0.75 (0.25-1.25)*    | 0.003        | 0.68 (0.25-1.11)*    | 0.002    |
| <b>Ever smoking</b> |                                               |                      |              |                      |          |
| No                  | 0.79 (0.48-1.28)                              |                      |              |                      |          |
| Yes                 | 1.02 (0.76-1.37)                              | 0.25 (-0.30-0.80)    | 0.372        | 0.25 (-0.53-1.03)    | 0.531    |
| <b>Diabetes</b>     |                                               |                      |              |                      |          |
| No                  | 1.00 (0.74-1.35)                              |                      |              |                      |          |
| Yes                 | 0.86 (0.55-1.34)                              | -0.15 (-0.68-0.38)   | 0.578        | -0.56 (-2.18-1.06)   | 0.495    |
| <b>Hypertension</b> |                                               |                      |              |                      |          |
| No                  | 1.22 (0.86-1.72)                              |                      |              |                      |          |
| Yes                 | 0.70 (0.47-1.02)                              | -0.56 (-1.06--0.06)* | 0.028        | -0.57 (-1.08--0.06)* | 0.027    |

(Continue Table S1)

| CLI                 |  |                  |                    |       |                          |
|---------------------|--|------------------|--------------------|-------|--------------------------|
| <b>Sex</b>          |  |                  |                    |       |                          |
| Male                |  | 1.02 (0.55-1.90) |                    |       |                          |
| Female              |  | 0.71 (0.40-1.28) | -0.36 (-1.19-0.46) | 0.392 | -0.35 (-1.16-0.46) 0.394 |
| <b>Race</b>         |  |                  |                    |       |                          |
| White               |  | 1.06 (0.62-1.82) |                    |       |                          |
| Black               |  | 0.54 (0.24-1.20) | -0.68 (-1.63-0.27) | 0.163 | -1.02 (-2.15-0.11) 0.076 |
| <b>Age</b>          |  |                  |                    |       |                          |
| <55                 |  | 0.72 (0.37-1.37) |                    |       |                          |
| ≥55                 |  | 0.95 (0.55-1.67) | 0.29 (-0.54-1.12)  | 0.495 | 0.23 (-0.55-1.01) 0.563  |
| <b>Ever smoking</b> |  |                  |                    |       |                          |
| No                  |  | 0.69 (0.34-1.38) |                    |       |                          |
| Yes                 |  | 0.95 (0.56-1.61) | 0.32 (-0.53-1.17)  | 0.460 | 0.23 (-0.68-1.14) 0.620  |
| <b>Diabetes</b>     |  |                  |                    |       |                          |
| No                  |  | 0.76 (0.42-1.40) |                    |       |                          |
| Yes                 |  | 0.92 (0.51-1.66) | 0.19 (-0.63-1.01)  | 0.650 | -0.34 (-4.50-3.83) 0.874 |
| <b>Hypertension</b> |  |                  |                    |       |                          |
| No                  |  | 1.22 (0.65-2.30) |                    |       |                          |
| Yes                 |  | 0.60 (0.33-1.10) | -0.71 (-1.56-0.14) | 0.102 | -0.85 (-1.84-0.13) 0.088 |
|                     |  |                  |                    |       |                          |

---

\* Statistically significant at 5%

† All models adjusted for age, sex, race, education, smoking status, drinking status, health insurance, leisure score, work score, body mass index, systolic blood pressure, total and HDL cholesterol, creatinine-derived eGFR, white blood cell, diabetes, antihypertensive medication use, cholesterol-lowering medication use, aspirin use, and interaction term

‡  $\beta_3$ , coefficient of interaction term; RERI, relative excess risk for interaction

§ PAD, peripheral artery disease; CLI, critical limb ischemia; Poor physical activity: 0 min/week of moderate or vigorous exercise; Intermediate physical activity: 1-74 min/week of vigorous exercise or 1-149 min/week of moderate plus vigorous exercise

**Table S2. Hazard ratios of incident PAD and CLI, multiplicative and additive interaction (95% confidence intervals) of per 200 METS\*mins/week increase in vigorous physical activity with demographic and clinical conditions.**

|                     | Per 200 METS<br>score increase in<br>vigorous physical<br>activity | $\beta_3$          | P-<br>values | RERI               | P-<br>values |
|---------------------|--------------------------------------------------------------------|--------------------|--------------|--------------------|--------------|
| <b>PAD</b>          |                                                                    |                    |              |                    |              |
| <b>Sex</b>          |                                                                    |                    |              |                    |              |
| Male                | 0.97 (0.90-1.04)                                                   |                    |              |                    |              |
| Female              | 0.84 (0.70-1.01)                                                   | -0.14 (-0.33-0.06) | 0.163        | -0.11 (-0.26-0.04) | 0.165        |
| <b>Race</b>         |                                                                    |                    |              |                    |              |
| White               | 0.95 (0.89-1.02)                                                   |                    |              |                    |              |
| Black               | 0.88 (0.73-1.06)                                                   | -0.08 (-0.28-0.12) | 0.444        | -0.12 (-0.37-0.12) | 0.327        |
| <b>Age</b>          |                                                                    |                    |              |                    |              |
| <55                 | 0.94 (0.86-1.02)                                                   |                    |              |                    |              |
| $\geq 55$           | 0.94 (0.85-1.04)                                                   | 0.01 (-0.12-0.14)  | 0.906        | -0.01 (-0.15-0.14) | 0.915        |
| <b>Ever smoking</b> |                                                                    |                    |              |                    |              |
| No                  | 0.94 (0.83-1.07)                                                   |                    |              |                    |              |
| Yes                 | 0.94 (0.87-1.01)                                                   | -0.01 (-0.15-0.14) | 0.942        | -0.08 (-0.29-0.12) | 0.429        |
| <b>Diabetes</b>     |                                                                    |                    |              |                    |              |
| No                  | 0.96 (0.89-1.02)                                                   |                    |              |                    |              |
| Yes                 | 0.80 (0.62-1.04)                                                   | -0.18 (-0.45-0.09) | 0.190        | -0.68 (-1.43-0.08) | 0.081        |
| <b>Hypertension</b> |                                                                    |                    |              |                    |              |
| No                  | 0.95 (0.88-1.03)                                                   |                    |              |                    |              |
| Yes                 | 0.91 (0.80-1.03)                                                   | -0.05 (-0.20-0.10) | 0.498        | -0.03 (-0.15-0.09) | 0.601        |

(Continue Table S2)

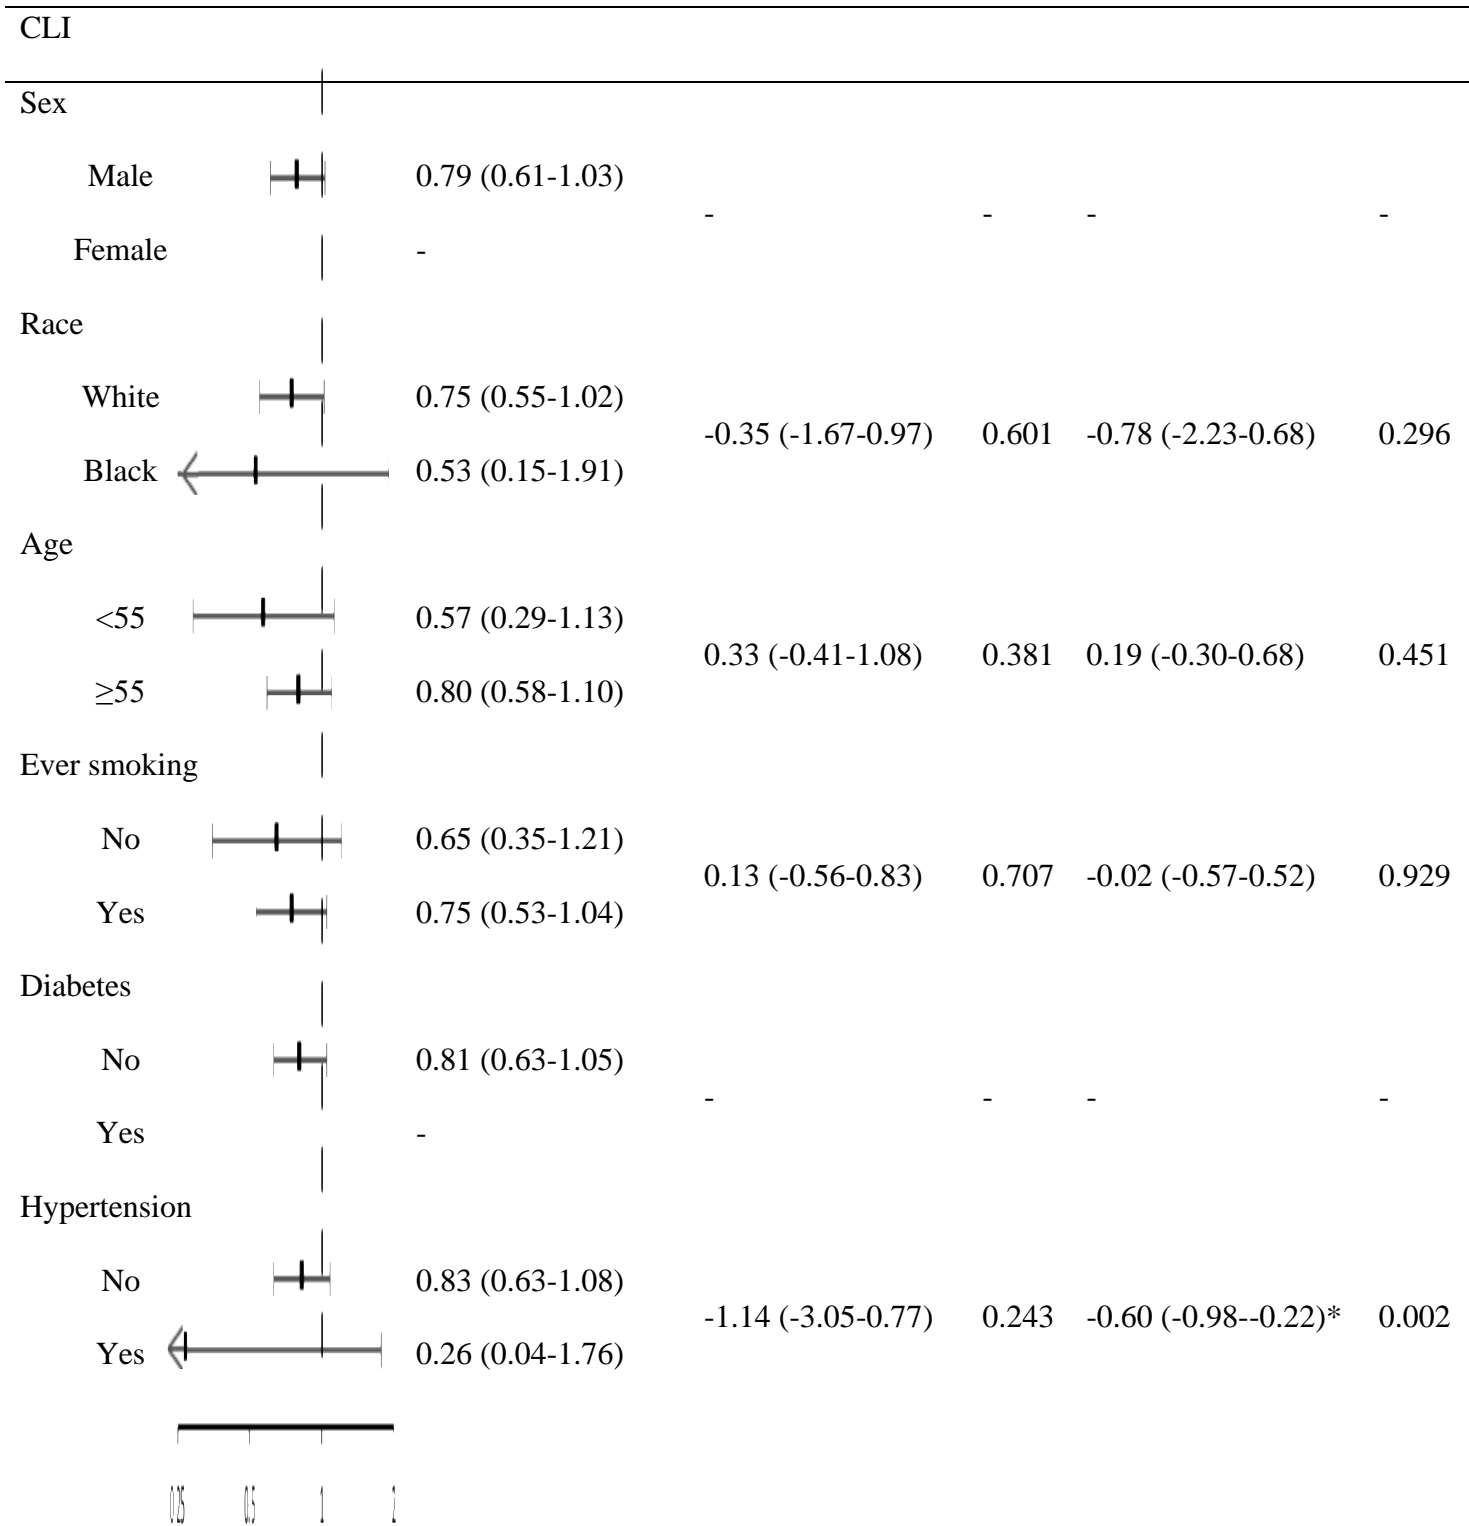

\* Statistically significant at 5%

† All models adjusted for age, sex, race, education, smoking status, drinking status, health insurance, leisure score, work score, body mass index, systolic blood pressure, total and HDL cholesterol, creatinine-derived eGFR, white blood cell, diabetes, antihypertensive medication use, cholesterol-lowering medication use, aspirin use, and

---

interaction term

‡  $\beta_3$ , coefficient of interaction term; RERI, relative excess risk for interaction

§ PAD, peripheral artery disease; CLI, critical limb ischemia

**Table S3. Hazard Ratios (95% Confidence Interval) for associations between American Heart Association-defined physical activity category with incident PAD and CLI with adjustment on baseline ABI category.**

| <b>AHA-defined Physical Activity categories</b> | <b>Number of participants</b> | <b>Number of events</b> | <b>model 1†</b>   | <b>model 2‡</b>   | <b>model 3§</b>  | <b>model 4  </b> | <b>model 5#</b>  |
|-------------------------------------------------|-------------------------------|-------------------------|-------------------|-------------------|------------------|------------------|------------------|
| <b>PAD</b>                                      |                               |                         |                   |                   |                  |                  |                  |
| <b>Poor</b>                                     | 4656                          | 193                     | 1(ref.)           | 1(ref.)           | 1(ref.)          | 1(ref.)          | 1(ref.)          |
| <b>Intermediate</b>                             | 3096                          | 101                     | 0.74 (0.58-0.94)* | 0.81 (0.63-1.03)  | 0.92 (0.72-1.18) | 0.91 (0.71-1.17) | 0.94 (0.73-1.21) |
| <b>Recommended</b>                              | 4761                          | 140                     | 0.68 (0.54-0.84)* | 0.69 (0.55-0.87)* | 0.84 (0.67-1.06) | 0.83 (0.65-1.05) | 0.84 (0.66-1.07) |
| <b>CLI</b>                                      |                               |                         |                   |                   |                  |                  |                  |
| <b>Poor</b>                                     | 4656                          | 88                      | 1(ref.)           | 1(ref.)           | 1(ref.)          | 1(ref.)          | 1(ref.)          |
| <b>Intermediate</b>                             | 3096                          | 32                      | 0.51 (0.34-0.76)* | 0.65 (0.43-0.98)* | 0.76 (0.50-1.15) | 0.77 (0.50-1.17) | 0.83 (0.54-1.26) |
| <b>Recommended</b>                              | 4761                          | 46                      | 0.49 (0.34-0.70)* | 0.62 (0.42-0.89)* | 0.77 (0.52-1.12) | 0.79 (0.53-1.18) | 0.81 (0.54-1.21) |

\* Statistically significant at 5%

† Model 1: Baseline ABI category



---

‡ Model 2: + Age, sex, race

§ Model 3: + Education, smoking status, drinking status, and health insurance

|| Model 4: + Leisure score and work score

# Model 5: + Body mass index, systolic blood pressure, total and HDL cholesterol, creatinine-derived eGFR, white blood cell, diabetes, antihypertensive medication use, cholesterol-lowering medication use, and aspirin use

\*\* PAD, peripheral artery disease; CLI, critical limb ischemia; AHA, American Heart Association

†† Poor: 0 min/week of moderate or vigorous exercise; Intermediate: 1-74 min/week of vigorous exercise or 1-149 min/week of moderate plus vigorous exercise;

Recommended:  $\geq 75$  min/week of vigorous exercise or  $\geq 150$  min/week of moderate plus vigorous exercise

**Table S4. Hazard Ratios (95% Confidence Interval) of incident PAD and CLI per 200 METS\*mins/week increase in moderate or vigorous physical activity with adjustment on baseline ABI category.**

| Physical activity intensity | model 1†           | model 2‡           | model 3§           | model 4            | model 5#           |
|-----------------------------|--------------------|--------------------|--------------------|--------------------|--------------------|
| <b>PAD</b>                  |                    |                    |                    |                    |                    |
| <b>Moderate</b>             | 0.99 (0.95-1.02)   | 0.98 (0.95-1.02)   | 1.00 (0.96-1.03)   | 1.00 (0.96-1.03)   | 1.00 (0.96-1.03)   |
| <b>Vigorous</b>             | 0.89 (0.83-0.95) * | 0.90 (0.84-0.96) * | 0.93 (0.87-0.99) * | 0.93 (0.87-0.99) * | 0.95 (0.89-1.02)   |
| <b>CLI</b>                  |                    |                    |                    |                    |                    |
| <b>Moderate</b>             | 0.95 (0.90-1.01)   | 0.97 (0.92-1.03)   | 0.99 (0.94-1.05)   | 1.00 (0.94-1.06)   | 1.00 (0.94-1.06)   |
| <b>Vigorous</b>             | 0.60 (0.43-0.84) * | 0.65 (0.47-0.89) * | 0.69 (0.51-0.93) * | 0.70 (0.52-0.94) * | 0.72 (0.53-0.97) * |

\* Statistically significant at 5%

† Model 1: Baseline ABI category

‡ Model 2: + Age, sex, race

§ Model 3: + Education, smoking status, drinking status, and health insurance

|| Model 4: + Leisure score and work score

---

# Model 5: + Body mass index, systolic blood pressure, total and HDL cholesterol, creatinine-derived eGFR, white blood cell, diabetes, antihypertensive medication use, cholesterol-lowering medication use, and aspirin use

\*\* PAD, peripheral artery disease; CLI, critical limb ischemia

**Table S5. Hazard Ratios (95% Confidence Interval) for associations between American Heart Association-defined physical activity category with incident PAD and CLI with additional censoring on incident cardiovascular diseases.**

| <b>AHA-defined Physical Activity categories</b> | <b>Number of participants</b> | <b>Number of events</b> | <b>model 1†</b>    | <b>model 2‡</b>    | <b>model 3§</b>  | <b>model 4  </b> | <b>model 5#</b>  |
|-------------------------------------------------|-------------------------------|-------------------------|--------------------|--------------------|------------------|------------------|------------------|
| <b>PAD</b>                                      |                               |                         |                    |                    |                  |                  |                  |
| <b>Poor</b>                                     | 4656                          | 168                     | 1(ref.)            | 1(ref.)            | 1(ref.)          | 1(ref.)          | 1(ref.)          |
| <b>Intermediate</b>                             | 3096                          | 93                      | 0.78 (0.60-0.99) * | 0.84 (0.65-1.08)   | 0.96 (0.74-1.24) | 0.95 (0.73-1.23) | 0.98 (0.75-1.28) |
| <b>Recommended</b>                              | 4761                          | 130                     | 0.70 (0.56-0.89) * | 0.71 (0.56-0.90) * | 0.87 (0.68-1.11) | 0.85 (0.66-1.09) | 0.87 (0.67-1.12) |
| <b>CLI</b>                                      |                               |                         |                    |                    |                  |                  |                  |
| <b>Poor</b>                                     | 4656                          | 74                      | 1(ref.)            | 1(ref.)            | 1(ref.)          | 1(ref.)          | 1(ref.)          |
| <b>Intermediate</b>                             | 3096                          | 27                      | 0.51 (0.33-0.79) * | 0.63 (0.41-0.99) * | 0.75 (0.47-1.17) | 0.76 (0.48-1.21) | 0.84 (0.53-1.33) |
| <b>Recommended</b>                              | 4761                          | 43                      | 0.53 (0.36-0.77) * | 0.65 (0.44-0.96) * | 0.82 (0.55-1.22) | 0.86 (0.57-1.31) | 0.90 (0.59-1.38) |

\* Statistically significant at 5%

† Model 1: Crude model

‡ Model 2: + Age, sex, race

---

§ Model 3: + Education, smoking status, drinking status, and health insurance

|| Model 4: + Leisure score and work score

# Model 5: + Body mass index, systolic blood pressure, total and HDL cholesterol, creatinine-derived eGFR, white blood cell, diabetes, antihypertensive medication use, cholesterol-lowering medication use, and aspirin use

\*\* PAD, peripheral artery disease; CLI, critical limb ischemia; AHA, American Heart Association

†† Poor: 0 min/week of moderate or vigorous exercise; Intermediate: 1-74 min/week of vigorous exercise or 1-149 min/week of moderate plus vigorous exercise;

Recommended:  $\geq 75$  min/week of vigorous exercise or  $\geq 150$  min/week of moderate plus vigorous exercise

**Table S6. Hazard Ratios (95% Confidence Interval) of incident PAD and CLI per 200 METS\*mins/week increase in moderate or vigorous physical activity with additional censoring on incident cardiovascular diseases.**

| Physical activity intensity | model 1†           | model 2‡           | model 3§           | model 4            | model 5#           |
|-----------------------------|--------------------|--------------------|--------------------|--------------------|--------------------|
| <b>PAD</b>                  |                    |                    |                    |                    |                    |
| <b>Moderate</b>             | 0.99 (0.95-1.02)   | 0.98 (0.94-1.02)   | 1.00 (0.96-1.03)   | 0.99 (0.96-1.03)   | 0.99 (0.96-1.03)   |
| <b>Vigorous</b>             | 0.90 (0.84-0.96) * | 0.90 (0.84-0.97) * | 0.94 (0.88-1.01)   | 0.94 (0.88-1.01)   | 0.96 (0.90-1.03)   |
| <b>CLI</b>                  |                    |                    |                    |                    |                    |
| <b>Moderate</b>             | 0.96 (0.90-1.02)   | 0.97 (0.91-1.04)   | 1.00 (0.94-1.06)   | 1.00 (0.94-1.07)   | 1.01 (0.94-1.08)   |
| <b>Vigorous</b>             | 0.63 (0.45-0.87) * | 0.67 (0.49-0.91) * | 0.71 (0.53-0.95) * | 0.72 (0.54-0.97) * | 0.74 (0.55-0.99) * |

\* Statistically significant at 5%

† Model 1: Crude model

‡ Model 2: + Age, sex, race

§ Model 3: + Education, smoking status, drinking status, and health insurance

|| Model 4: + Leisure score and work score

---

# Model 5: + Body mass index, systolic blood pressure, total and HDL cholesterol, creatinine-derived eGFR, white blood cell, diabetes, antihypertensive medication use, cholesterol-lowering medication use, and aspirin use

\*\* PAD, peripheral artery disease; CLI, critical limb ischemia

**Table S7. Hazard Ratios (95% Confidence Interval) for associations between American Heart Association-defined physical activity category with incident PAD and CLI with lag years.**

| <b>AHA-defined Physical Activity categories</b> | <b>Number of participants</b> | <b>Number of events</b> | <b>model 1†</b>    | <b>model 2‡</b>    | <b>model 3§</b>  | <b>model 4  </b> | <b>model 5 #</b> |
|-------------------------------------------------|-------------------------------|-------------------------|--------------------|--------------------|------------------|------------------|------------------|
| <b>Lag 1 year</b>                               |                               |                         |                    |                    |                  |                  |                  |
| <b>PAD</b>                                      |                               |                         |                    |                    |                  |                  |                  |
| <b>Poor</b>                                     | 4654                          | 191                     | 1(ref.)            | 1(ref.)            | 1(ref.)          | 1(ref.)          | 1(ref.)          |
| <b>Intermediate</b>                             | 3096                          | 101                     | 0.74 (0.58-0.95) * | 0.81 (0.64-1.04)   | 0.94 (0.74-1.21) | 0.93 (0.72-1.19) | 0.96 (0.74-1.23) |
| <b>Recommended</b>                              | 4759                          | 138                     | 0.66 (0.53-0.82) * | 0.68 (0.54-0.85) * | 0.85 (0.67-1.07) | 0.82 (0.64-1.05) | 0.84 (0.66-1.08) |
| <b>CLI</b>                                      |                               |                         |                    |                    |                  |                  |                  |
| <b>Poor</b>                                     | 4654                          | 88                      | 1(ref.)            | 1(ref.)            | 1(ref.)          | 1(ref.)          | 1(ref.)          |
| <b>Intermediate</b>                             | 3096                          | 32                      | 0.51 (0.34-0.76) * | 0.64 (0.43-0.97) * | 0.77 (0.51-1.16) | 0.77 (0.51-1.18) | 0.82 (0.53-1.25) |
| <b>Recommended</b>                              | 4759                          | 46                      | 0.48 (0.33-0.68) * | 0.60 (0.42-0.87) * | 0.78 (0.53-1.14) | 0.79 (0.53-1.18) | 0.81 (0.54-1.21) |
| <b>Lag 2 years</b>                              |                               |                         |                    |                    |                  |                  |                  |
| <b>PAD</b>                                      |                               |                         |                    |                    |                  |                  |                  |



|                     |      |     |                    |                    |                  |                  |                  |
|---------------------|------|-----|--------------------|--------------------|------------------|------------------|------------------|
| <b>Poor</b>         | 4654 | 191 | 1(ref.)            | 1(ref.)            | 1(ref.)          | 1(ref.)          | 1(ref.)          |
| <b>Intermediate</b> | 3096 | 101 | 0.74 (0.58-0.94) * | 0.82 (0.64-1.04)   | 0.94 (0.74-1.21) | 0.93 (0.72-1.20) | 0.96 (0.75-1.24) |
| <b>Recommended</b>  | 4755 | 134 | 0.64 (0.51-0.80) * | 0.66 (0.53-0.83) * | 0.82 (0.65-1.04) | 0.80 (0.63-1.03) | 0.82 (0.64-1.05) |
| <b>CLI</b>          |      |     |                    |                    |                  |                  |                  |
| <b>Poor</b>         | 4654 | 88  | 1(ref.)            | 1(ref.)            | 1(ref.)          | 1(ref.)          | 1(ref.)          |
| <b>Intermediate</b> | 3096 | 32  | 0.51 (0.34-0.76) * | 0.64 (0.43-0.97) * | 0.77 (0.51-1.16) | 0.77 (0.51-1.18) | 0.82 (0.53-1.25) |
| <b>Recommended</b>  | 4755 | 46  | 0.48 (0.33-0.68) * | 0.60 (0.42-0.87) * | 0.78 (0.53-1.14) | 0.79 (0.53-1.18) | 0.81 (0.54-1.21) |

**Lag 3 years**

---

|                     |      |     |                    |                    |                  |                  |                  |
|---------------------|------|-----|--------------------|--------------------|------------------|------------------|------------------|
| <b>PAD</b>          |      |     |                    |                    |                  |                  |                  |
| <b>Poor</b>         | 4651 | 188 | 1(ref.)            | 1(ref.)            | 1(ref.)          | 1(ref.)          | 1(ref.)          |
| <b>Intermediate</b> | 3096 | 101 | 0.75 (0.59-0.96) * | 0.83 (0.65-1.06)   | 0.96 (0.75-1.23) | 0.95 (0.74-1.22) | 0.98 (0.76-1.26) |
| <b>Recommended</b>  | 4754 | 133 | 0.65 (0.52-0.81) * | 0.67 (0.53-0.84) * | 0.83 (0.66-1.05) | 0.81 (0.63-1.04) | 0.83 (0.65-1.07) |
| <b>CLI</b>          |      |     |                    |                    |                  |                  |                  |
| <b>Poor</b>         | 4651 | 86  | 1(ref.)            | 1(ref.)            | 1(ref.)          | 1(ref.)          | 1(ref.)          |
| <b>Intermediate</b> | 3096 | 32  | 0.52 (0.35-0.78) * | 0.66 (0.44-1.00)   | 0.78 (0.52-1.19) | 0.79 (0.52-1.21) | 0.84 (0.55-1.30) |

|                    |      |    |                    |                    |                  |                  |                  |
|--------------------|------|----|--------------------|--------------------|------------------|------------------|------------------|
| <b>Recommended</b> | 4754 | 46 | 0.49 (0.34-0.70) * | 0.62 (0.43-0.90) * | 0.80 (0.54-1.17) | 0.82 (0.55-1.22) | 0.84 (0.56-1.25) |
|--------------------|------|----|--------------------|--------------------|------------------|------------------|------------------|

**Lag 4 years**

---

**PAD**

|                     |      |     |                    |                    |                  |                  |                  |
|---------------------|------|-----|--------------------|--------------------|------------------|------------------|------------------|
| <b>Poor</b>         | 4649 | 186 | 1(ref.)            | 1(ref.)            | 1(ref.)          | 1(ref.)          | 1(ref.)          |
| <b>Intermediate</b> | 3093 | 98  | 0.74 (0.58-0.94) * | 0.81 (0.63-1.04)   | 0.94 (0.73-1.21) | 0.93 (0.72-1.20) | 0.97 (0.75-1.25) |
| <b>Recommended</b>  | 4753 | 132 | 0.65 (0.52-0.81) * | 0.67 (0.53-0.85) * | 0.83 (0.66-1.06) | 0.82 (0.64-1.05) | 0.85 (0.66-1.09) |

**CLI**

|                     |      |    |                    |                    |                  |                  |                  |
|---------------------|------|----|--------------------|--------------------|------------------|------------------|------------------|
| <b>Poor</b>         | 4649 | 86 | 1(ref.)            | 1(ref.)            | 1(ref.)          | 1(ref.)          | 1(ref.)          |
| <b>Intermediate</b> | 3093 | 31 | 0.50 (0.33-0.76) * | 0.64 (0.42-0.97) * | 0.76 (0.50-1.16) | 0.77 (0.50-1.17) | 0.82 (0.53-1.26) |
| <b>Recommended</b>  | 4753 | 46 | 0.49 (0.34-0.70) * | 0.62 (0.43-0.90) * | 0.79 (0.54-1.16) | 0.81 (0.54-1.21) | 0.84 (0.56-1.25) |

**Lag 5 years**

---

**PAD**

|                     |      |     |                    |                  |                  |                  |                  |
|---------------------|------|-----|--------------------|------------------|------------------|------------------|------------------|
| <b>Poor</b>         | 4646 | 183 | 1(ref.)            | 1(ref.)          | 1(ref.)          | 1(ref.)          | 1(ref.)          |
| <b>Intermediate</b> | 3092 | 97  | 0.74 (0.58-0.95) * | 0.82 (0.64-1.05) | 0.95 (0.74-1.22) | 0.94 (0.73-1.22) | 0.98 (0.75-1.26) |

|                     |      |     |                    |                    |                  |                  |                  |
|---------------------|------|-----|--------------------|--------------------|------------------|------------------|------------------|
| <b>Recommended</b>  | 4751 | 130 | 0.65 (0.52-0.81) * | 0.67 (0.53-0.85) * | 0.83 (0.66-1.06) | 0.83 (0.64-1.06) | 0.85 (0.66-1.10) |
| <b>CLI</b>          |      |     |                    |                    |                  |                  |                  |
| <b>Poor</b>         | 4646 | 84  | 1(ref.)            | 1(ref.)            | 1(ref.)          | 1(ref.)          | 1(ref.)          |
| <b>Intermediate</b> | 3092 | 31  | 0.52 (0.34-0.78) * | 0.66 (0.43-1.00)   | 0.78 (0.51-1.19) | 0.79 (0.51-1.21) | 0.85 (0.55-1.31) |
| <b>Recommended</b>  | 4751 | 46  | 0.50 (0.35-0.72) * | 0.64 (0.44-0.93) * | 0.82 (0.56-1.20) | 0.84 (0.56-1.25) | 0.86 (0.57-1.29) |

\* Statistically significant at 5%

† Model 1: Crude model

‡ Model 2: + Age, sex, race

§ Model 3: + Education, smoking status, drinking status, and health insurance

|| Model 4: + Leisure score and work score

# Model 5: + Body mass index, systolic blood pressure, total and HDL cholesterol, creatinine-derived eGFR, white blood cell, diabetes, antihypertensive medication use, cholesterol-lowering medication use, and aspirin use

\*\* PAD, peripheral artery disease; CLI, critical limb ischemia; AHA, American Heart Association

†† Poor: 0 min/week of moderate or vigorous exercise; Intermediate: 1-74 min/week of vigorous exercise or 1-149 min/week of moderate plus vigorous exercise;

Recommended:  $\geq 75$  min/week of vigorous exercise or  $\geq 150$  min/week of moderate plus vigorous exercise

**Table S8. Hazard Ratios (95% Confidence Interval) of incident PAD and CLI per 200 METS\*mins/week increase in moderate or vigorous physical activity with lag years.**

| <b>Physical activity intensity</b> | <b>model 1†</b>    | <b>model 2‡</b>    | <b>model 3§</b>    | <b>model 4  </b>   | <b>model 5#</b>    |
|------------------------------------|--------------------|--------------------|--------------------|--------------------|--------------------|
| <b>Lag 1 year</b>                  |                    |                    |                    |                    |                    |
| <b>PAD</b>                         |                    |                    |                    |                    |                    |
| <b>Moderate</b>                    | 0.98 (0.94-1.01)   | 0.98 (0.94-1.01)   | 1.00 (0.96-1.03)   | 0.99 (0.96-1.03)   | 1.00 (0.96-1.03)   |
| <b>Vigorous</b>                    | 0.89 (0.83-0.95) * | 0.90 (0.84-0.96) * | 0.93 (0.87-1.00) * | 0.93 (0.87-1.00) * | 0.95 (0.89-1.02)   |
| <b>CLI</b>                         |                    |                    |                    |                    |                    |
| <b>Moderate</b>                    | 0.93 (0.88-0.99) * | 0.96 (0.90-1.02)   | 0.99 (0.93-1.05)   | 0.99 (0.93-1.06)   | 1.00 (0.94-1.06)   |
| <b>Vigorous</b>                    | 0.59 (0.42-0.82) * | 0.64 (0.47-0.88) * | 0.69 (0.51-0.93) * | 0.70 (0.52-0.94) * | 0.72 (0.54-0.97) * |
| <b>Lag 2 years</b>                 |                    |                    |                    |                    |                    |
| <b>PAD</b>                         |                    |                    |                    |                    |                    |
| <b>Moderate</b>                    | 0.97 (0.94-1.01)   | 0.97 (0.94-1.01)   | 0.99 (0.96-1.03)   | 0.99 (0.96-1.03)   | 0.99 (0.96-1.03)   |
| <b>Vigorous</b>                    | 0.89 (0.83-0.95) * | 0.90 (0.84-0.96) * | 0.93 (0.88-1.00) * | 0.94 (0.88-1.00) * | 0.95 (0.89-1.02)   |

**CLI**

|                 |                    |                    |                    |                    |                    |
|-----------------|--------------------|--------------------|--------------------|--------------------|--------------------|
| <b>Moderate</b> | 0.93 (0.88-0.99) * | 0.96 (0.90-1.02)   | 0.99 (0.93-1.05)   | 0.99 (0.93-1.06)   | 1.00 (0.94-1.06)   |
| <b>Vigorous</b> | 0.59 (0.42-0.82) * | 0.64 (0.47-0.88) * | 0.69 (0.51-0.93) * | 0.70 (0.52-0.94) * | 0.72 (0.54-0.97) * |

**Lag 3 years**

---

**PAD**

|                 |                    |                    |                    |                  |                  |
|-----------------|--------------------|--------------------|--------------------|------------------|------------------|
| <b>Moderate</b> | 0.98 (0.94-1.01)   | 0.97 (0.94-1.01)   | 1.00 (0.96-1.03)   | 1.00 (0.96-1.03) | 1.00 (0.96-1.03) |
| <b>Vigorous</b> | 0.89 (0.83-0.95) * | 0.90 (0.84-0.96) * | 0.94 (0.88-1.00) * | 0.94 (0.88-1.00) | 0.96 (0.89-1.02) |

**CLI**

|                 |                    |                    |                    |                    |                    |
|-----------------|--------------------|--------------------|--------------------|--------------------|--------------------|
| <b>Moderate</b> | 0.94 (0.88-0.99) * | 0.96 (0.91-1.02)   | 0.99 (0.93-1.05)   | 1.00 (0.94-1.06)   | 1.00 (0.94-1.07)   |
| <b>Vigorous</b> | 0.59 (0.42-0.83) * | 0.64 (0.47-0.88) * | 0.69 (0.51-0.93) * | 0.70 (0.52-0.94) * | 0.72 (0.54-0.97) * |

**Lag 4 years**

---

**PAD**

|                 |                    |                    |                  |                  |                  |
|-----------------|--------------------|--------------------|------------------|------------------|------------------|
| <b>Moderate</b> | 0.98 (0.94-1.01)   | 0.97 (0.94-1.01)   | 1.00 (0.96-1.03) | 1.00 (0.96-1.03) | 1.00 (0.96-1.04) |
| <b>Vigorous</b> | 0.89 (0.83-0.95) * | 0.90 (0.84-0.96) * | 0.94 (0.88-1.00) | 0.94 (0.88-1.00) | 0.96 (0.90-1.02) |

**CLI**

|                 |                    |                    |                    |                    |                    |
|-----------------|--------------------|--------------------|--------------------|--------------------|--------------------|
| <b>Moderate</b> | 0.93 (0.88-0.99) * | 0.96 (0.91-1.02)   | 0.99 (0.93-1.05)   | 1.00 (0.94-1.06)   | 1.00 (0.94-1.07)   |
| <b>Vigorous</b> | 0.59 (0.42-0.83) * | 0.64 (0.47-0.88) * | 0.69 (0.51-0.93) * | 0.70 (0.52-0.94) * | 0.72 (0.54-0.97) * |

**Lag 5 years****PAD**

|                 |                    |                    |                  |                  |                  |
|-----------------|--------------------|--------------------|------------------|------------------|------------------|
| <b>Moderate</b> | 0.98 (0.94-1.01)   | 0.98 (0.94-1.01)   | 1.00 (0.96-1.03) | 1.00 (0.96-1.03) | 1.00 (0.96-1.04) |
| <b>Vigorous</b> | 0.89 (0.83-0.95) * | 0.90 (0.84-0.96) * | 0.94 (0.88-1.00) | 0.94 (0.88-1.00) | 0.96 (0.90-1.03) |

**CLI**

|                 |                    |                    |                    |                    |                    |
|-----------------|--------------------|--------------------|--------------------|--------------------|--------------------|
| <b>Moderate</b> | 0.94 (0.88-1.00) * | 0.97 (0.91-1.03)   | 0.99 (0.94-1.05)   | 1.00 (0.94-1.06)   | 1.00 (0.94-1.07)   |
| <b>Vigorous</b> | 0.59 (0.43-0.83) * | 0.65 (0.47-0.88) * | 0.69 (0.51-0.94) * | 0.70 (0.52-0.95) * | 0.73 (0.54-0.98) * |

---

\* Statistically significant at 5%

† Model 1: Crude model

‡ Model 2: + Age, sex, race

§ Model 3: + Education, smoking status, drinking status, and health insurance

|| Model 4: + Leisure score and work score

---

# Model 5: + Body mass index, systolic blood pressure, total and HDL cholesterol, creatinine-derived eGFR, white blood cell, diabetes, antihypertensive medication use, cholesterol-lowering medication use, and aspirin use

\*\* PAD, peripheral artery disease; CLI, critical limb ischemia

**Table S9. Hazard Ratios (95% Confidence Interval) for associations between 5 physical activity categories regardless of intensity with incident PAD and CLI.**

| <b>Physical Activity categories</b> | <b>Number of participants</b> | <b>Number of events</b> | <b>model 1†</b>   | <b>model 2‡</b>   | <b>model 3§</b>  | <b>model 4  </b> | <b>model 5#</b>  |
|-------------------------------------|-------------------------------|-------------------------|-------------------|-------------------|------------------|------------------|------------------|
| <b>PAD</b>                          |                               |                         |                   |                   |                  |                  |                  |
| <b>0 min/week</b>                   | 4524                          | 189                     | 1(ref.)           | 1(ref.)           | 1(ref.)          | 1(ref.)          | 1(ref.)          |
| <b>1-74 min/week</b>                | 1251                          | 35                      | 0.64 (0.45-0.92)* | 0.69 (0.48-0.99)* | 0.78 (0.54-1.13) | 0.77 (0.54-1.11) | 0.80 (0.56-1.16) |
| <b>75-149 min/week</b>              | 1803                          | 62                      | 0.76 (0.57-1.01)  | 0.82 (0.62-1.10)  | 0.98 (0.73-1.32) | 0.97 (0.72-1.30) | 0.98 (0.73-1.33) |
| <b>150-299 min/week</b>             | 2872                          | 88                      | 0.69 (0.53-0.88)* | 0.72 (0.56-0.93)* | 0.90 (0.69-1.17) | 0.88 (0.67-1.15) | 0.87 (0.66-1.14) |
| <b>≥300 min/week</b>                | 2063                          | 60                      | 0.65 (0.49-0.87)* | 0.65 (0.48-0.88)* | 0.81 (0.60-1.09) | 0.78 (0.57-1.07) | 0.89 (0.65-1.22) |
| <b>P-value for trend</b>            |                               |                         | <0.001            | 0.002             | 0.232            | 0.179            | 0.383            |
| <b>CLI</b>                          |                               |                         |                   |                   |                  |                  |                  |
| <b>0 min/week</b>                   | 4524                          | 87                      | 1(ref.)           | 1(ref.)           | 1(ref.)          | 1(ref.)          | 1(ref.)          |
| <b>1-74 min/week</b>                | 1251                          | 13                      | 0.52 (0.29-0.92)* | 0.62 (0.35-1.12)  | 0.73 (0.41-1.32) | 0.73 (0.41-1.32) | 0.79 (0.44-1.44) |
| <b>75-149 min/week</b>              | 1803                          | 18                      | 0.48 (0.29-0.79)* | 0.60 (0.36-1.00)  | 0.73 (0.43-1.22) | 0.74 (0.44-1.25) | 0.79 (0.47-1.34) |
| <b>150-299 min/week</b>             | 2872                          | 29                      | 0.49 (0.32-0.75)* | 0.62 (0.41-0.96)* | 0.80 (0.51-1.24) | 0.81 (0.52-1.27) | 0.78 (0.49-1.22) |



|                          |      |    |                   |                   |                  |                  |                  |
|--------------------------|------|----|-------------------|-------------------|------------------|------------------|------------------|
| <b>≥300 min/week</b>     | 2063 | 19 | 0.44 (0.27-0.73)* | 0.57 (0.34-0.95)* | 0.73 (0.44-1.23) | 0.75 (0.44-1.28) | 0.93 (0.54-1.61) |
| <b>P-value for trend</b> |      |    | <0.001            | 0.006             | 0.157            | 0.216            | 0.408            |

---

\* Statistically significant at 5%

† Model 1: Crude model

‡ Model 2: + Age, sex, race

§ Model 3: + Education, smoking status, drinking status, and health insurance

|| Model 4: + Leisure score and work score

# Model 5: + Body mass index, systolic blood pressure, total and HDL cholesterol, creatinine-derived eGFR, white blood cell, diabetes, antihypertensive medication use, cholesterol-lowering medication use, and aspirin use

\*\* PAD, peripheral artery disease; CLI, critical limb ischemia
